# Supplementary material
Source: Springer Nature journal article supplement (https://www.springermedizin.de/resource/supplementary/12876_2007_242_MOESM4_ESM.pdf/9439108)

**GATA-4****GATA-6****IHH**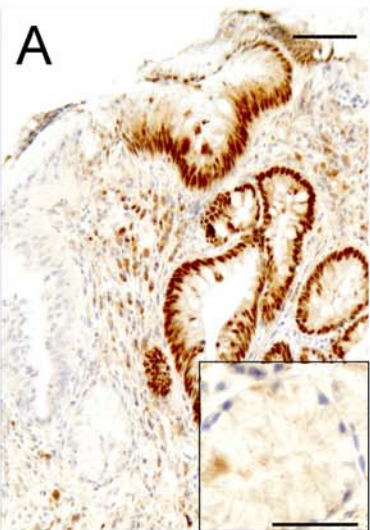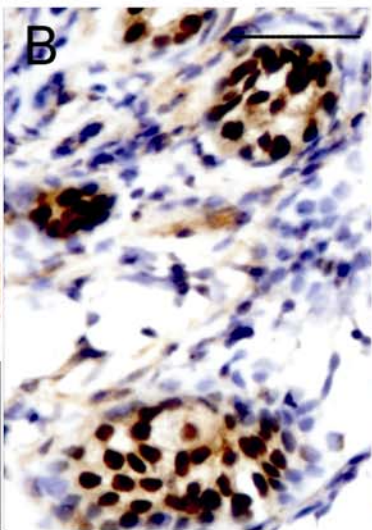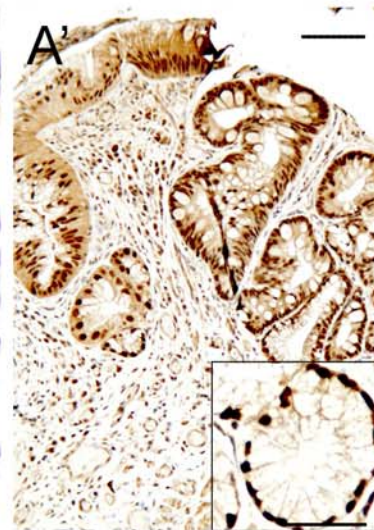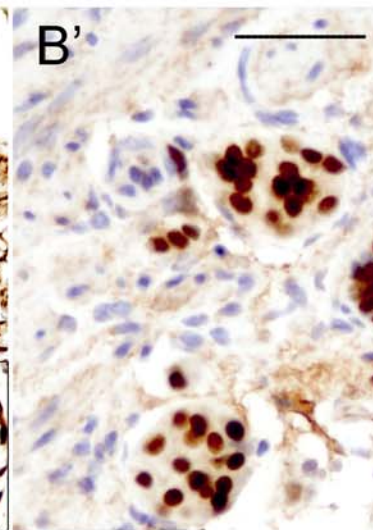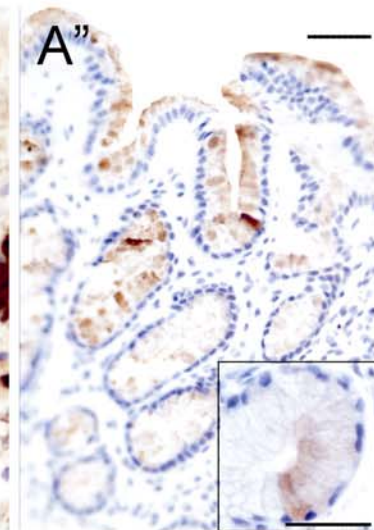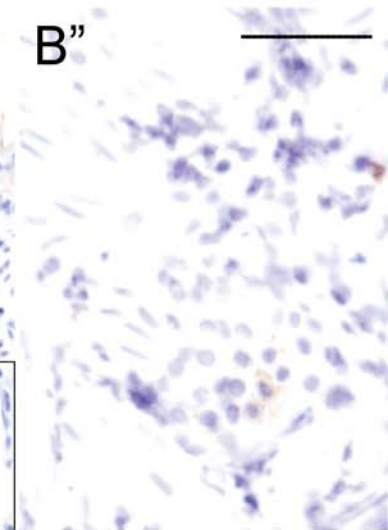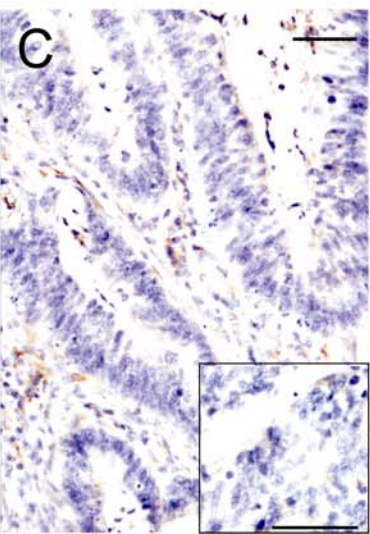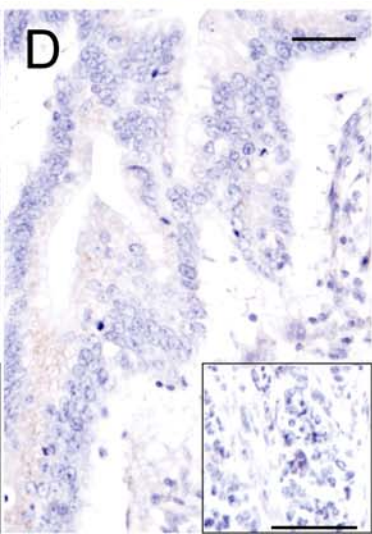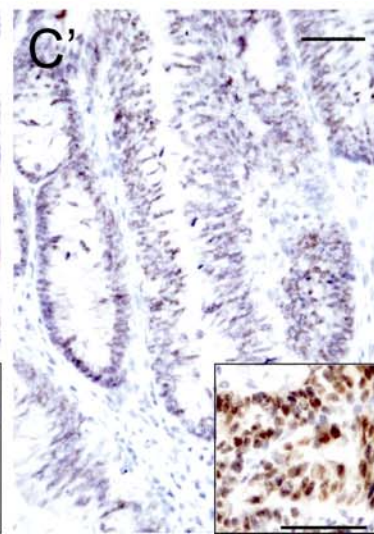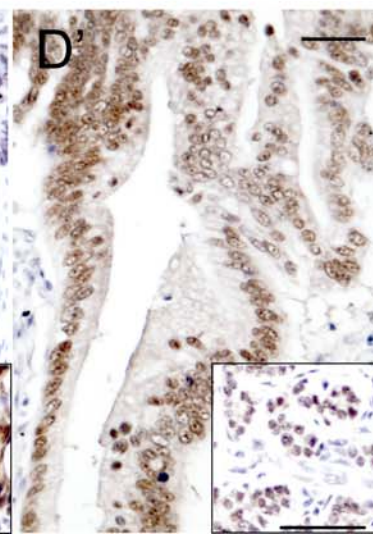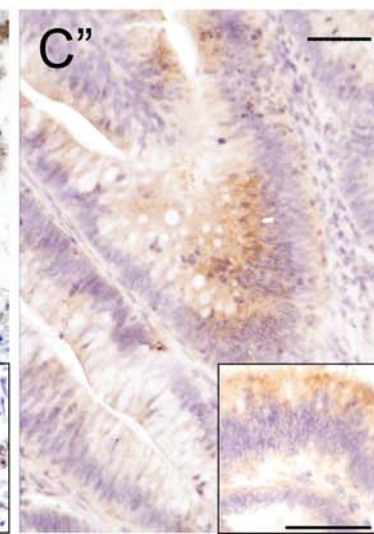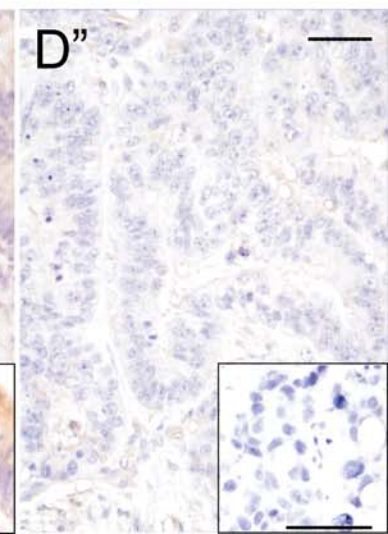

Supplement: MOESM4 [file 9439108]
